# Supplementary material
Source: ML conference proceedings conference paper supplement (https://openreview.net/forum?id=tVTN7Zs0ml)

t-SNE Projection between Word/Cluster Embedding

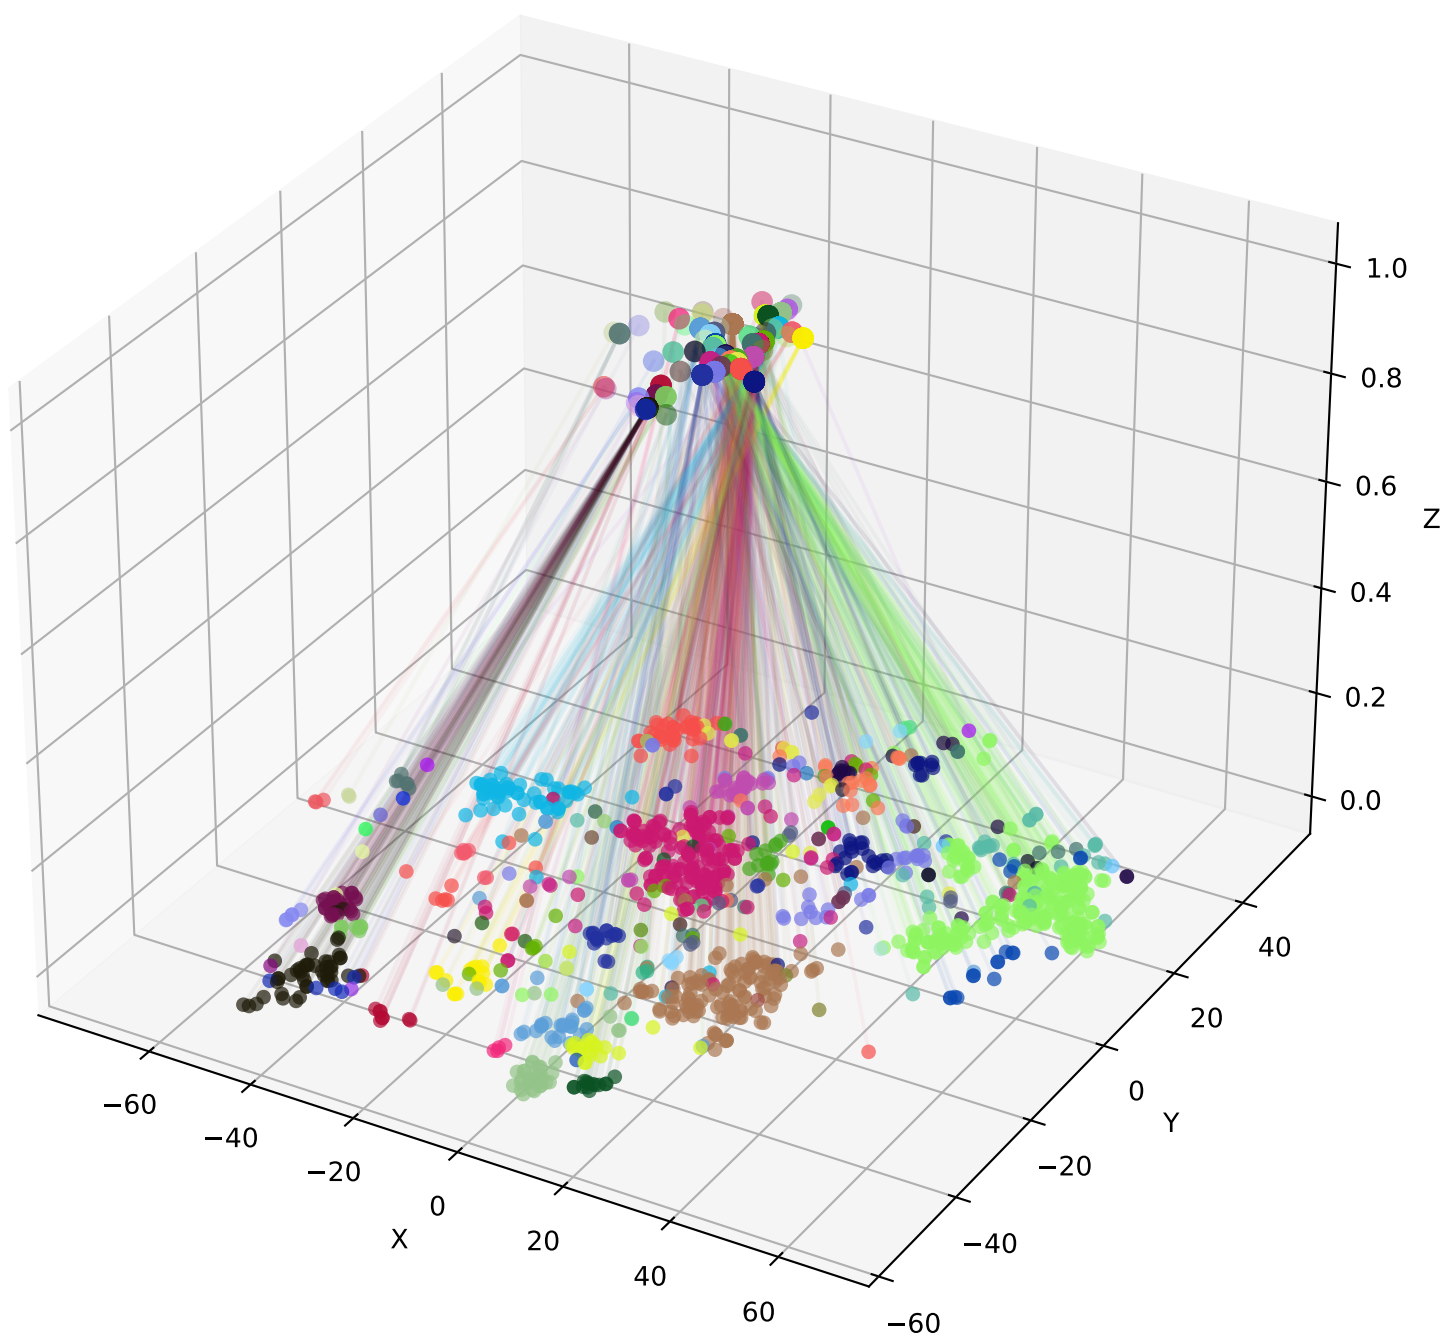

Supplement: supplementary_material [file attachment]
